# Supplementary material for: Enhancing SIM behaviour in a mononuclear tetrahedral [Co(N,N′-2-iminopyrrolyl)2] complex
Source: Royal Society of Chemistry journal article supplement (doi:10.1039/d2cc03511a), 2022-01-01
Supplement: d2cc03511a1.pdf [file d2cc03511a1.pdf]

*Electronic Supplementary Information for*

**Enhancing SIM behaviour in a mononuclear tetrahedral  
[Co(N,N'-2-iminopyrrolyl)<sub>2</sub>] complex**

Patrícia S. Ferreira,<sup>a,b</sup> José F. Malta,<sup>b,c</sup> Nuno A. G. Bandeira,<sup>\*d</sup> Alexander Allgaier,<sup>e</sup>  
Joris van Slageren,<sup>\*e</sup> José A. Paixão,<sup>c</sup> Manuel Almeida,<sup>b</sup> Laura C. J. Pereira,<sup>\*b</sup>  
Pedro T. Gomes<sup>\*a</sup>

<sup>a</sup> Centro de Química Estrutural, Institute of Molecular Sciences, Departamento de Engenharia Química, Instituto Superior Técnico, Universidade de Lisboa, Av. Rovisco Pais 1, 1049-001 Lisboa, Portugal.  
E-mail: [pedro.t.gomes@tecnico.ulisboa.pt](mailto:pedro.t.gomes@tecnico.ulisboa.pt)

<sup>b</sup> Centro de Ciências e Tecnologias Nucleares, Departamento de Engenharia e Ciências Nucleares, Instituto Superior Técnico, Universidade de Lisboa, 2695-066 Bobadela LRS, Portugal.  
E-mail: [lpereira@ctn.tecnico.ulisboa.pt](mailto:lpereira@ctn.tecnico.ulisboa.pt)

<sup>c</sup> CFisUC - Centro de Física da Universidade de Coimbra, Departamento de Física, Universidade de Coimbra, Portugal.

<sup>d</sup> BioISI - Biosystems & Integrative Sciences Institute, Departamento de Química e Bioquímica, Faculdade de Ciências, Universidade de Lisboa, Campo Grande, Ed. C8, 1749-016 Lisboa, Portugal.  
E-mail: [nuno.bandeira@fc.ul.pt](mailto:nuno.bandeira@fc.ul.pt)

<sup>e</sup> Institut für Physikalische Chemie, Universität Stuttgart, Pfaffenwaldring 55, Stuttgart D-70569, Germany. E-mail: [slageren@ipc.uni-stuttgart.de](mailto:slageren@ipc.uni-stuttgart.de)

**Table of Contents**

|                                                    |     |
|----------------------------------------------------|-----|
| Experimental section.....                          | S2  |
| General considerations .....                       | S2  |
| Synthesis of complex <b>1</b> .....                | S2  |
| <sup>1</sup> H NMR and FTIR spectra.....           | S3  |
| Nuclear Magnetic Resonance (NMR) measurements..... | S4  |
| Single crystal X-ray diffraction .....             | S4  |
| HFEPR details .....                                | S7  |
| Computational details .....                        | S8  |
| Computational results .....                        | S9  |
| Magnetic measurements.....                         | S11 |
| References .....                                   | S16 |

## Experimental section

### General Considerations

All operations dealing with air- and/or moisture-sensitive materials were carried out under inert atmosphere using a dual vacuum/nitrogen line, glovebox and standard Schlenk techniques. All solvents used were pre-dried with 4 Å molecular sieves and purified by refluxing over a suitable drying agent followed by distillation under nitrogen. THF was dried over sodium/benzophenone and *n*-hexane over calcium hydride. Solvents and solutions were transferred using a positive pressure of nitrogen through stainless steel cannulas and mixtures were filtered in a similar way using modified cannulas that could be fitted with glass fiber filter disks.

Elemental analyses were performed in a Fisons Instrument Mod EA-1108, at Laboratório de Análises (IST).

FTIR measurements were conducted on a Bruker Alpha II ATR IR spectrometer located inside a glovebox.

### Synthesis of complex [Co{ $\kappa^2$ N,N'-5-(2,4,6-*i*Pr<sub>3</sub>-C<sub>6</sub>H<sub>2</sub>)-NC<sub>4</sub>H<sub>2</sub>-2-C(H)=N(2,6-*i*Pr<sub>2</sub>-C<sub>6</sub>H<sub>3</sub>)}<sub>2</sub>] (**1**)

NaH (0.041 g, 1.7 mmol) was suspended in THF (20 mL) and a THF (20 mL) solution of the ligand precursor 5-(2,4,6-triisopropylphenyl)-2-(N-2,6-diisopropylphenylformimino)pyrrole<sup>1</sup> (0.68 g, 1.5 mmol) was added. The mixture was allowed to stir for 2 hours, at 90 °C, under nitrogen, yielding a brown-red suspension. After cooling to room temperature, the solution was filtered and added dropwise to a suspension of anhydrous CoCl<sub>2</sub> (0.097 g, 0.75 mmol) in THF (10 mL), which was cooled to -80 °C. The mixture was allowed to warm up to room temperature while stirring overnight. All volatiles were evaporated under reduced pressure, and the residue was extracted with *n*-hexane until extracts were colourless. The solution was concentrated and stored at -20 °C, from which red crystals of **1** suitable for X-ray diffraction were obtained. Yield: 0.42 g (62%).

<sup>1</sup>H NMR (300 MHz, C<sub>6</sub>D<sub>6</sub>)  $\delta$  113.64 (br), 44.29 (br), 32.76 (br), 9.47 (br), 4.27 (br), 0.67 (br), -2.05 (br), -4.41 (br), -5.77 (br), -6.14 (br), -6.31 (br), -7.75 (br), -12.85 (br), -17.21 (br), -20.59 (br), -22.85 (br).  $\mu_{\text{eff}}$  (toluene-*d*<sub>8</sub>, r.t.): 5.2  $\mu_{\text{B}}$ ;  $\mu_{\text{eff}}$  (solid state, r.t.): 4.7  $\mu_{\text{B}}$ . FTIR (ATR, cm<sup>-1</sup>): 1569 (s, C=N). *Anal.* Calc. for C<sub>50</sub>H<sub>66</sub>CoN<sub>4</sub>: C, 79.22; H, 8.93; N, 5.77. Found: C, 79.10; H, 9.37; N, 5.80.

### $^1\text{H}$ NMR spectrum

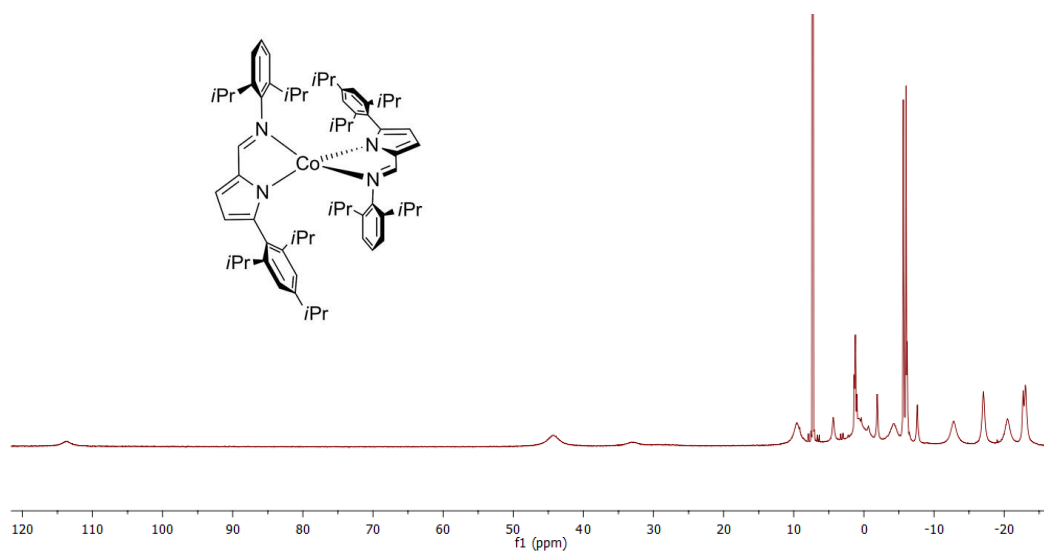

Figure S1  $^1\text{H}$  NMR spectrum (300 MHz,  $\text{C}_6\text{D}_6$ ) of **1**.

### FTIR spectrum

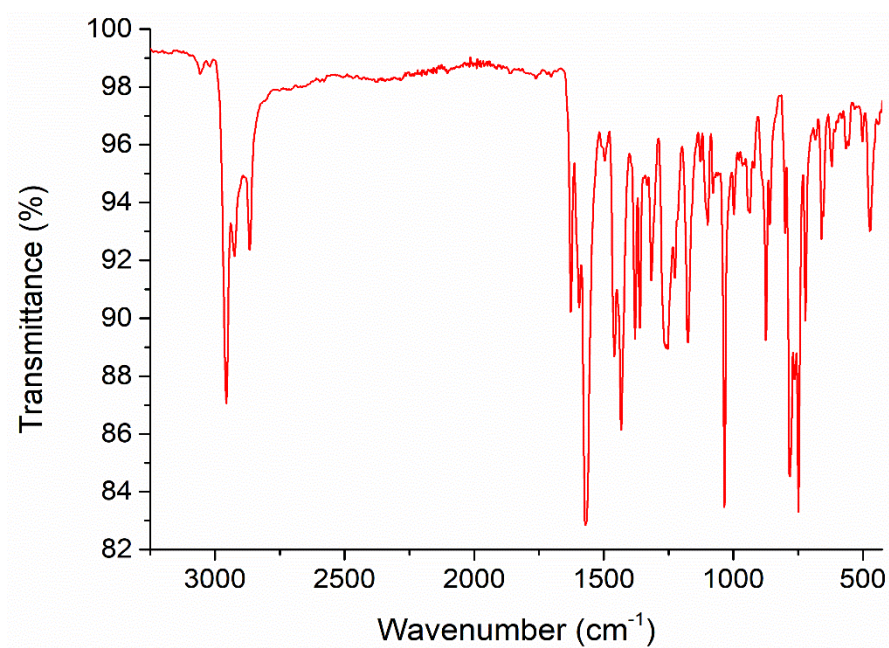

Figure S2 FTIR spectrum of complex **1**.

## Nuclear Magnetic Resonance (NMR) measurements

The NMR spectrum of complex **1** was recorded on a Bruker Avance III 300 ( $^1\text{H}$ , 300.130 MHz;  $^{13}\text{C}$ , 75.468 MHz) spectrometer. The spectrum was referenced internally using the residual protio-solvent ( $^1\text{H}$ ), being reported relative to tetramethylsilane ( $\delta = 0$ ). Complex **1** was dissolved in degassed and dried  $\text{C}_6\text{D}_6$ , being the solution prepared in a J. Young tube, in a glovebox. The deuterated solvents were dried over activated 4 Å molecular sieves and degassed by the freeze-pump-thaw technique. All resonances were characterized by their chemical shifts ( $\delta$ ), quoted in ppm and the multiplicities were abbreviated as broad (br).

The magnetic susceptibility measurement in solution was performed on a Bruker AVANCE III 300 MHz spectrometer at 298 K using the Evans method,<sup>2</sup> the solution sample being prepared in toluene- $d_8$  with 3% hexamethyldisiloxane, inside a dinitrogen filled glovebox, and transferred to a J. Young NMR tube containing a capillary tube filled with the same solvent mixture, in which hexamethyldisiloxane is the external reference.

## Single crystal X-ray diffraction

Single crystals of **1** were covered with polyfluoroether oil, selected under an inert atmosphere, and mounted on a nylon loop. The crystallographic data were collected using graphite monochromated Mo-K $\alpha$  radiation ( $\lambda = 0.71073$  Å) on a Bruker AXS-KAPPA APEX II diffractometer equipped with an Oxford Cryosystem open-flow nitrogen cryostat, at 150 K. Cell parameters were retrieved using Bruker SMART software and refined using Bruker SAINT<sup>3</sup> on all observed reflections. Absorption corrections were applied using SADABS.<sup>4</sup> Structure solution and refinement were performed using direct methods with the programs SIR2014<sup>5</sup> and SHELXL<sup>6</sup> included in the package of programs WINGX-Version 2014.1.<sup>7</sup> All non-hydrogen atoms were refined anisotropically and the hydrogen atoms were inserted in idealized positions and refined as riding on the parent carbon atom. All the structures refined to a perfect convergence. The graphic presentation was generated using ORTEP-3,<sup>8</sup> where ellipsoids were drawn with a 30% probability, and the hydrogen atoms were omitted for clarity; Mercury 2020.3.0 software was used for the generation of the spacefill representation in Figure S3. Data for complex **1** was deposited in CCDC under the deposit number 2179439.

**Table S1** Selected bond distances (Å) and bond angles (°),  $\theta$ ,  $\phi$ , and  $\omega$  angles and parameters  $\tau_4$  for complex **1**.

| <i>Distances (Å)</i>                 |            |
|--------------------------------------|------------|
| Co-N1                                | 1.999(3)   |
| Co-N2                                | 2.034(4)   |
| Co-N3                                | 2.004(4)   |
| Co-N4                                | 2.036(4)   |
| <i>Angles (°)</i>                    |            |
| N1-Co-N3                             | 118.72(14) |
| N2-Co-N4                             | 124.82(15) |
| N1-Co-N4                             | 122.35(15) |
| N3-Co-N2                             | 126.98(15) |
| N1-Co-N2 ( $\theta_1$ ) <sup>a</sup> | 84.43(15)  |
| N3-Co-N4 ( $\theta_2$ ) <sup>a</sup> | 84.38(15)  |
| Angle $\phi$ <sup>b</sup>            | 87.32(15)  |
| Angle $\omega$ <sup>c</sup>          | 163.69(9)  |
| Parameter $\tau_4$ <sup>d</sup>      | 0.77       |

<sup>a</sup>  $\theta_1$  and  $\theta_2$  = N-Co-N chelating ligands bite angles; <sup>b</sup>  $\phi$  = dihedral angle formed between planes defined by atoms (Co, N1, N2) and (Co, N3, N4); <sup>c</sup>  $\omega$  = interligand angle formed between dummy bonds Co-centroid (C2-C6) and Co-centroid (C34-C38); <sup>d</sup> Ref. 9

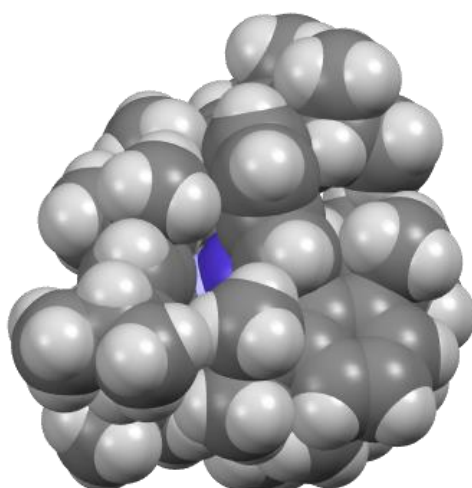

**Figure S3** Spacefill view of the X-ray molecular structure of complex **1**, showing the stereochemical protection of the Co(II) metal centre.

**Table S2** Crystallographic data for complex **1**.

|                                                |                                                  |
|------------------------------------------------|--------------------------------------------------|
| Formula                                        | C <sub>64</sub> H <sub>86</sub> CoN <sub>4</sub> |
| <i>M</i>                                       | 970.29                                           |
| $\lambda$ (Å)                                  | 0.71073                                          |
| <i>T</i> (K)                                   | 150(2)                                           |
| Crystal system                                 | Monoclinic                                       |
| Space group                                    | <i>P</i> 2 <sub>1</sub> / <i>c</i>               |
| <i>a</i> (Å)                                   | 12.9181(10)                                      |
| <i>b</i> (Å)                                   | 23.922(2)                                        |
| <i>c</i> (Å)                                   | 18.3733(14)                                      |
| $\alpha$ (°)                                   | 90                                               |
| $\beta$ (°)                                    | 96.868(3)                                        |
| $\gamma$ (°)                                   | 90                                               |
| <i>V</i> (Å <sup>3</sup> )                     | 5637.2(8)                                        |
| <i>Z</i>                                       | 4                                                |
| $\rho_{\text{calc}}$ (g·cm <sup>-3</sup> )     | 1.143                                            |
| $\mu$ (mm <sup>-1</sup> )                      | 0.346                                            |
| Crystal size                                   | 0.200×0.140×0.100                                |
| Crystal colour                                 | Red                                              |
| Crystal description                            | Prism                                            |
| $\theta_{\text{max}}$ (°)                      | 25.714                                           |
| Total data                                     | 31313                                            |
| Unique data                                    | 10672                                            |
| <i>R</i> <sub>int</sub>                        | 0.1894                                           |
| <i>R</i> [ <i>I</i> > 2 <i>s</i> ( <i>I</i> )] | 0.0720                                           |
| <i>R</i> <sub>w</sub>                          | 0.1365                                           |
| Goodness of fit                                | 0.934                                            |

## **HFEPR details**

The spectra were recorded at 320 GHz, 0-15 T and 50-120 K on a home-built spectrometer consisting of a VDI signal generator, VDI broadband frequency multipliers, a Thomas Keating Ltd. quasioptical bridge and probe, and a QMC Instruments InSb bolometer detector.<sup>10</sup> The samples were mounted in a 15 T Oxford Instruments helium bath magnetocryostat. The external field is modulated at kHz frequencies to allow for lock-in detection.

## Computational details

The ORCA program<sup>11</sup> package version 5.0.3 was used for all the property calculations using the structures derived from single-crystal X-ray diffraction as input. The N-Electron Valence perturbational method<sup>12,13</sup> to second order was employed with the Resolution of Identity<sup>14</sup> (RI-NEVPT2) approximation. The Complete Active Space Self-Consistent Field (CASSCF)<sup>15</sup> wavefunction was determined in the full configuration interaction (CI) space as the state-average of 10 quartets and 40 doublets (seven electrons in five 3d orbitals). The single state perturbed NEVPT2 wavefunctions underwent a multi-state extension to quasi-degenerate NEVPT2 (QD-NEVPT2)<sup>16</sup> in the Nakano<sup>17</sup> formulation.

The exchange integrals were calculated through the RI<sup>18</sup> density fitting technique. The Douglas-Kroll-Hess<sup>19-21</sup> scalar relativistic Hamiltonian truncated to second order (DKH2) was applied with the correspondingly contracted triple zeta doubly polarized basis sets (DKH-TZVPP) for cobalt, for nitrogen DKH-TZVP, and for C and H a split-valence basis set (DKH-SV(P)). The density fitting auxiliary basis sets were chosen to be the generic Karlsruhe<sup>22</sup> def2-TZVP/C specific basis set for the treatment of the perturbative RI section.

The anisotropy ( $D$ ,  $E$ ) parameters and  $g$  values were calculated in the framework of QD-NEVPT2 via the spin-orbit mean field<sup>23,24</sup> formalism using an effective Hamiltonian<sup>25</sup> by projection of the CI matrix onto the model states. The spin orbit states were projected onto the spin Hamiltonian:

$$\hat{H} = \hat{\mathbf{S}}\mathbf{D}\hat{\mathbf{S}} \quad (\text{S1})$$

$$\hat{H}_{ZFS} = D\hat{S}_z^2 + E(\hat{S}_x^2 - \hat{S}_y^2) \quad (\text{S2})$$

where  $\mathbf{D}$  is the zero-field splitting tensor (equation S1) possessing the following scalar parameters in the magnetic axis frame (equation S2):  $D=3/2D_{zz}$  and  $E=(D_{xx}-D_{yy})/2$ . By convention  $D_{xx}\geq D_{yy}$  so that  $E$  is always positive. If  $D<0$  there may be a barrier for magnetization reversal ( $-M_s\rightarrow+M_s$ ), whereas for  $D>0$  there can be no magnetization reversal and the spin aligns itself in the xy plane.

## Computational results

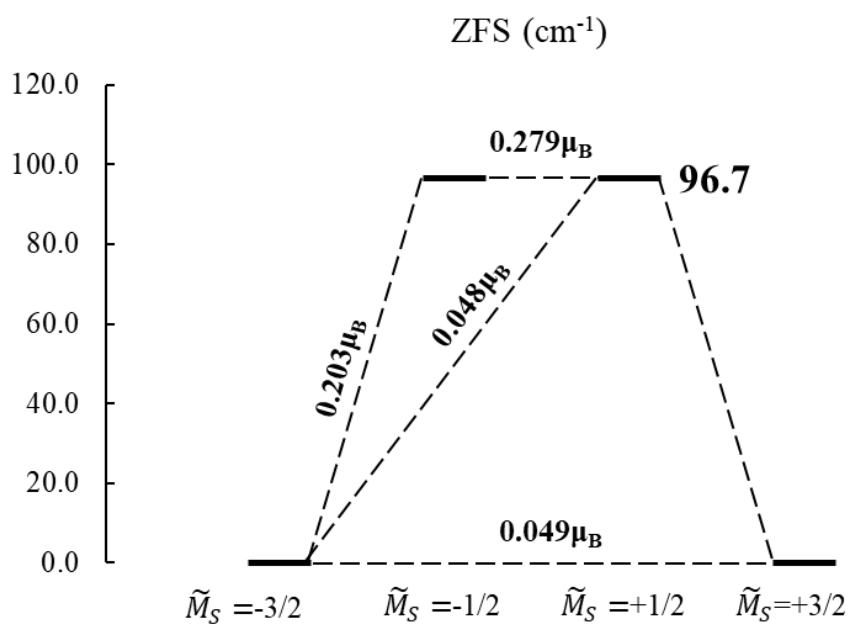

**Figure S4** Kramers doublets and zero-field splitting of the title complex with associated transition magnetic moments between each state.

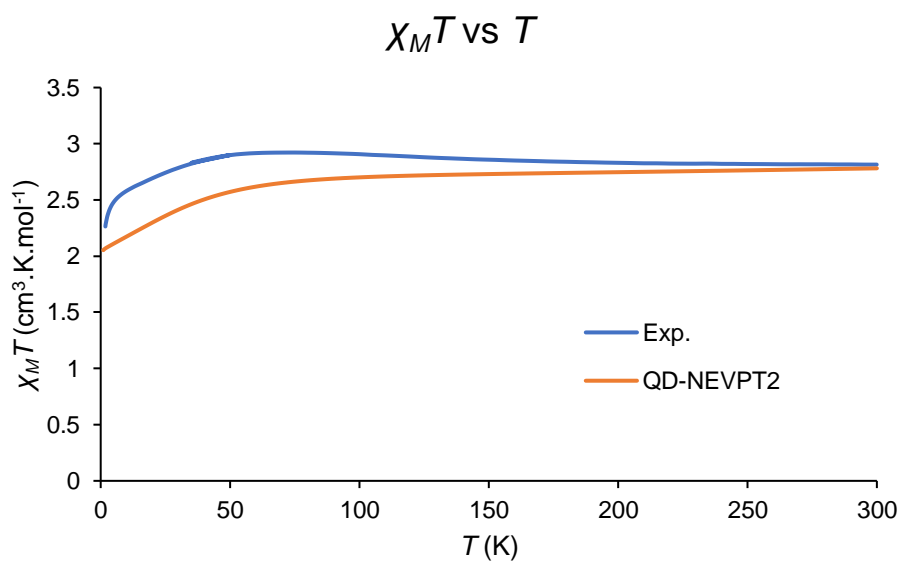

**Figure S5** Experimental and calculated  $\chi_M T$  vs.  $T$  curves ( $H = 500$  Oe) of complex **1**.

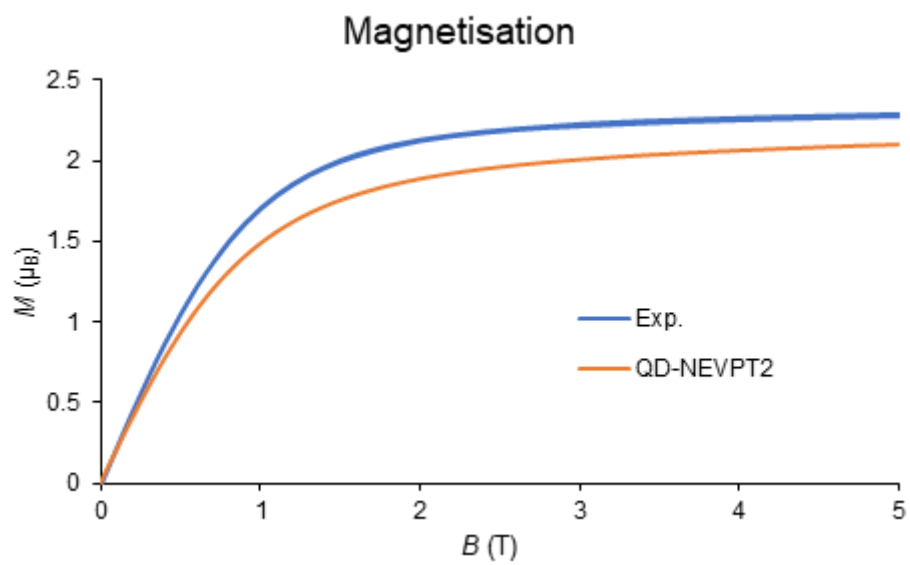

**Figure S6** Experimental and calculated magnetisation ( $M$ ) vs.  $B$  curves ( $T = 1.8$  K) of complex **1**.

## Magnetic measurements

A sample of complex **1** (8 mg) was weighed and transferred to the sample holder in a glovebox, due to its air sensitivity.

The static (DC) magnetic measurements were performed using a Quantum Design MPMS3 magnetometer using an applied field of 1000 Oe (0.1 T), from 1.8-50 K, and 10000 Oe (1 T), from 35-300 K. The magnetization curves were obtained from 0 to 7 T at different temperatures (1.8, 5, 10, 20 and 40 K). The measured susceptibility was corrected for diamagnetic and temperature-independent paramagnetic contributions.<sup>26</sup>

The dynamic (AC) magnetic measurements were performed using the ACMS II option of the Quantum Design PPMS (Physical Property Measurement System). The temperature-dependence of the in-phase and out-of-phase components of the AC susceptibility were studied at different frequencies, from 128 up to 5000 Hz, under zero and 1200 Oe applied DC magnetic field, while the frequency-dependent measurements of the AC susceptibility were performed at several different temperatures from 5.5 K to 13.5 K, under zero and 1200 Oe.

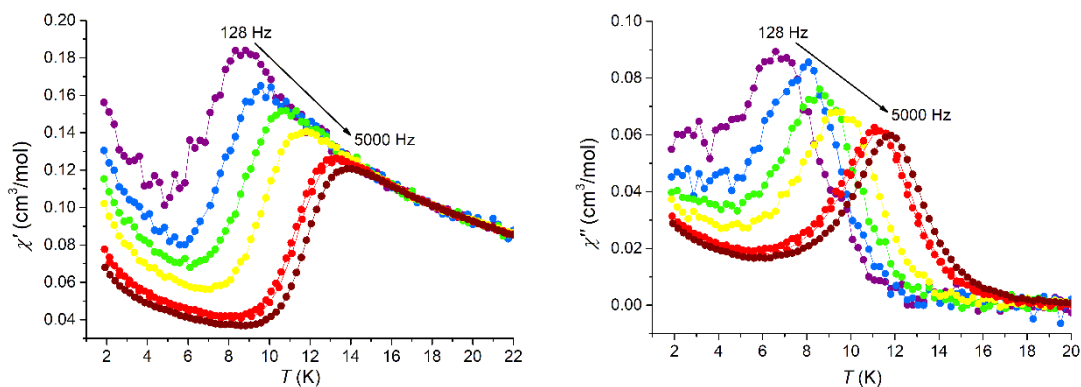

**Figure S7** Temperature-dependence of the in-phase,  $\chi'$  (left) and out-of-phase,  $\chi''$  (right) magnetic susceptibilities at several different frequencies in the absence of an external magnetic field.

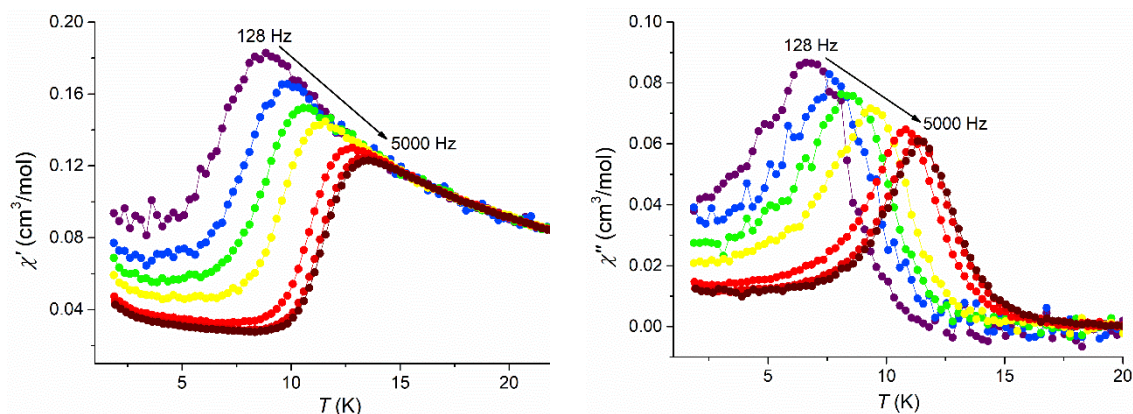

**Figure S8** Temperature-dependence of the in-phase,  $\chi'$  (left) and out-of-phase,  $\chi''$  (right) magnetic susceptibilities at several different frequencies under a DC applied magnetic field of 1200 Oe.

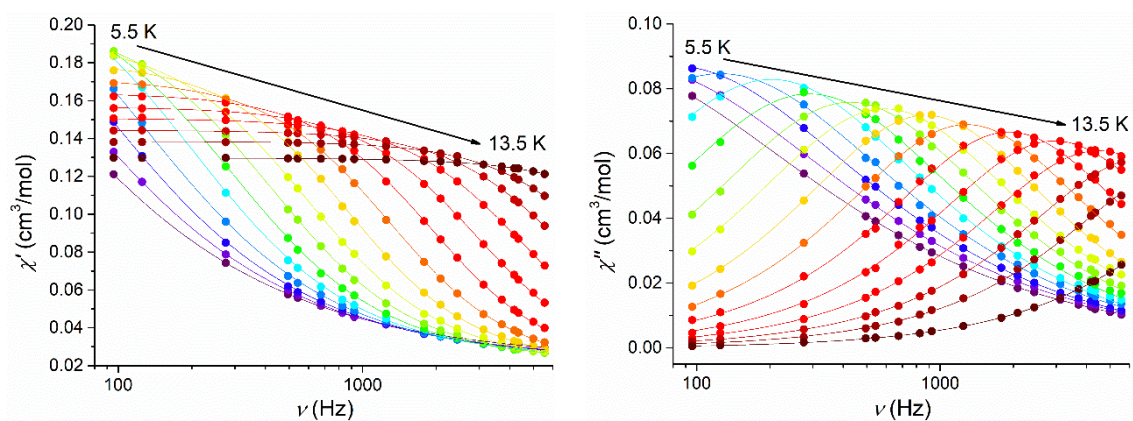

**Figure S9** Frequency-dependence of the in-phase,  $\chi'$  (left) and out-of-phase,  $\chi''$  (right) magnetic susceptibilities at several different temperatures for **1** under an applied DC field of 1200 Oe. The solid lines are for guidance.

**Table S3** Fitting parameters of the generalized Debye model for complex **1**, from 6 to 13.5 K, without the application of a DC field.

| <i>T</i> (K) | $\chi_T$ (cm <sup>3</sup> /mol) | $\chi_S$ (cm <sup>3</sup> /mol) | $\tau$ (s)                | $\alpha$  |
|--------------|---------------------------------|---------------------------------|---------------------------|-----------|
| 6            | 0.328(1)                        | 0.03515(9)                      | $2.96(3) \times 10^{-3}$  | 0.299(2)  |
| 6.5          | 0.291(1)                        | 0.0338(1)                       | $1.82(1) \times 10^{-3}$  | 0.270(2)  |
| 7            | 0.2652(8)                       | 0.0327(1)                       | $1.220(9) \times 10^{-3}$ | 0.230(2)  |
| 7.5          | 0.240(2)                        | 0.0322(4)                       | $8.2(1) \times 10^{-4}$   | 0.183(5)  |
| 8            | 0.228(2)                        | 0.0301(7)                       | $5.7(1) \times 10^{-4}$   | 0.165(8)  |
| 8.5          | 0.210(2)                        | 0.0288(7)                       | $4.03(6) \times 10^{-4}$  | 0.136(8)  |
| 9            | 0.1978(8)                       | 0.0283(5)                       | $2.87(3) \times 10^{-4}$  | 0.106(5)  |
| 9.5          | 0.1867(7)                       | 0.0267(5)                       | $2.06(2) \times 10^{-4}$  | 0.093(5)  |
| 10           | 0.1757(4)                       | 0.0256(4)                       | $1.434(7) \times 10^{-4}$ | 0.075(3)  |
| 10.5         | 0.1638(4)                       | 0.0257(5)                       | $9.96(6) \times 10^{-5}$  | 0.040(4)  |
| 11           | 0.1587(2)                       | 0.0238(4)                       | $7.01(3) \times 10^{-5}$  | 0.045(3)  |
| 11.5         | 0.1514(1)                       | 0.0232(4)                       | $4.84(2) \times 10^{-5}$  | 0.029(3)  |
| 12           | 0.1454(1)                       | 0.0224(6)                       | $3.35(2) \times 10^{-5}$  | 0.024(3)  |
| 12.5         | 0.13946(9)                      | 0.0240(8)                       | $2.38(2) \times 10^{-5}$  | 0.0087(3) |
| 13           | 0.13478(7)                      | 0.025(1)                        | $1.69(2) \times 10^{-5}$  | 0.006(3)  |
| 13.5         | 0.13057(5)                      | 0.025(1)                        | $1.20(2) \times 10^{-5}$  | 0.011(3)  |

**Table S4** Fitting parameters of the generalized Debye model for complex **1**, from 5.5 to 13.5 K, under an applied DC field of 1200 Oe.

| $T$ (K) | $\chi_T$ (cm <sup>3</sup> /mol) | $\chi_S$ (cm <sup>3</sup> /mol) | $\tau$ (s)                | $\alpha$  |
|---------|---------------------------------|---------------------------------|---------------------------|-----------|
| 5.5     | 0.350(3)                        | 0.0223(1)                       | $4.67(9) \times 10^{-3}$  | 0.367(2)  |
| 6       | 0.322(2)                        | 0.0217(1)                       | $3.02(3) \times 10^{-3}$  | 0.331(1)  |
| 6.5     | 0.297(2)                        | 0.0222(2)                       | $1.96(3) \times 10^{-3}$  | 0.282(3)  |
| 7       | 0.273(2)                        | 0.0217(3)                       | $1.27(2) \times 10^{-3}$  | 0.245(4)  |
| 7.5     | 0.244(1)                        | 0.0227(4)                       | $7.8(1) \times 10^{-4}$   | 0.181(4)  |
| 8       | 0.223(1)                        | 0.0217(4)                       | $5.48(5) \times 10^{-4}$  | 0.156(4)  |
| 8.5     | 0.2054(7)                       | 0.0214(3)                       | $3.74(2) \times 10^{-4}$  | 0.123(3)  |
| 9       | 0.1944(4)                       | 0.0209(2)                       | $2.68(1) \times 10^{-4}$  | 0.103(2)  |
| 9.5     | 0.1814(4)                       | 0.0214(3)                       | $1.823(7) \times 10^{-4}$ | 0.069(3)  |
| 10      | 0.1720(3)                       | 0.0199(3)                       | $1.249(4) \times 10^{-4}$ | 0.062(2)  |
| 10.5    | 0.1642(3)                       | 0.0199(4)                       | $8.29(4) \times 10^{-5}$  | 0.051(3)  |
| 11      | 0.1568(2)                       | 0.0188(5)                       | $5.39(3) \times 10^{-5}$  | 0.049(3)  |
| 11.5    | 0.1507(2)                       | 0.0195(7)                       | $3.55(3) \times 10^{-5}$  | 0.0479(3) |
| 12      | 0.14442(7)                      | 0.0200(6)                       | $2.31(2) \times 10^{-5}$  | 0.043(2)  |
| 12.5    | 0.1385(1)                       | 0.021(2)                        | $1.56(3) \times 10^{-5}$  | 0.032(5)  |
| 13.5    | 0.12975(4)                      | 0.018(3)                        | $6.7(2) \times 10^{-6}$   | 0.050(4)  |

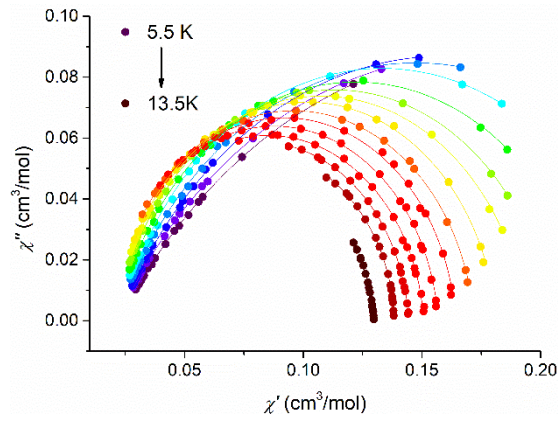

**Figure S10** Cole-Cole plots under an applied DC field of 1200 Oe. The solid lines represent the best fits to the experimental data using the generalised Debye model.

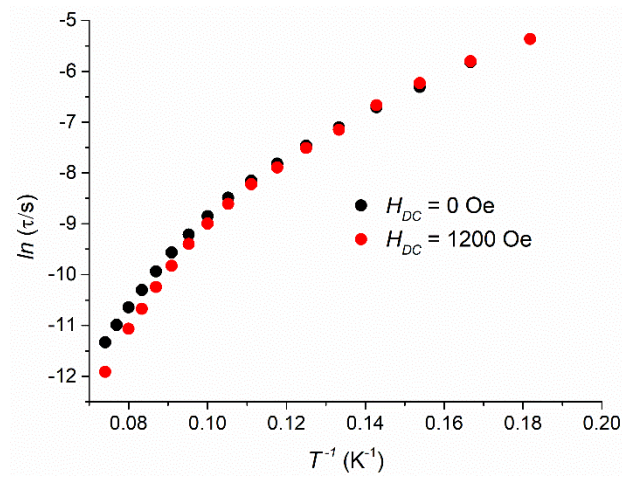

**Figure S11** Superposition of both  $\ln(\tau)$  vs.  $T^{-1}$  plots under  $H_{DC} = 0$  Oe (black) and  $H_{DC} = 1200$  Oe (red).

## References

1. T. F. C. Cruz, P. S. Lopes, L. C. J. Pereira, L. F. Veiros, P. T. Gomes, *Inorg. Chem.* 2018, **57**, 8146–8159.
2. (a) D. F. Evans, *J. Chem. Soc.*, 1959, 2003–2005; (b) S. K. Sur, *J. Magn. Reson.*, 1989, **82**, 169–173.
3. *SAINT Software for the CCD Detector System*, Version 7.03, Bruker AXS Inc., Madison, WI, USA, 2004.
4. G. M. Sheldrick, *SADABS, Program for Empirical Absorption Correction*, Univ. of Göttingen, German, 1996.
5. M. C. Burla, R. Caliendo, B. Carrozzini, G. L. Cascarano, C. Cuocci, C. Giacovazzo, M. Mallamo, A. Mazzone, G. Polidori, *J. Appl. Cryst.*, 2015, **48**, 306–309.
6. (a) G. M. Sheldrick, *Acta Crystallogr.*, 2015, **71**, 3 G. M. Sheldrick, *Acta Crystallogr.*, 2015, **71**, 3–8; (b) C. B. Hübschle, G. M. Sheldrick, B. Dittrich, *J. Appl. Crystallogr.*, 2011, **44**, 1281–1284.
7. (a) L. J. Farrugia, *J. Appl. Crystallogr.*, 1999, **32**, 837–838; (b) L. J. Farrugia, *J. Appl. Crystallogr.*, 2012, **45**, 849–854.
8. (a) M. N. Burnett, C. K. Johnson, *ORTEP-III: Oak Ridge Thermal Ellipsoid Plot Program for Crystal Structure Illustration*, Oak Ridge National Laboratory, 1996, 6895; (b) L. J. Farrugia, *J. Appl. Crystallogr.*, 1997, **30**, 565.
9. L. Yang, D. R. Powell, R. P. Houser, *Dalton Trans.* 2007, 955–964.
10. P. Neugebauer, D. Bloos, R. Marx, P. Lutz, M. Kern, D. Aguilà, J. Vaverka, O. Laguta, C. Dietrich, R. Clérac, J. van Slageren, 2018, **20**, 15528–15534.
11. F. Neese, *WIREs Comput. Mol. Sci.*, 2017, **8**, e1327.
12. C. Angeli, R. Cimiraglia, S. Evangelisti, T. Leininger, J.-P. Malrieu, *J. Chem. Phys.*, 2001, **114**, 10252–10264.
13. C. Angeli, R. Cimiraglia, J.-P. Malrieu, *Chem. Phys. Lett.*, 2001, **350**, 297–305.
14. O. Vahtras, J. Almlöf, M. W. Feyereisen, *Chem. Phys. Lett.*, 1993, **213**, 514–518.
15. B. O. Roos, *The Complete Active Space Self-Consistent Field Method and its Applications in Electronic Structure Calculations*, in *Advances in Chemical Physics*, ed. K. P. Lawley, John Wiley & Sons, Inc., 1987, pp. 399–445.
16. C. Angeli, S. Borini, M. Cestari, R. Cimiraglia, *J. Chem. Phys.*, 2004, **121**, 4043–4049.
17. H. Nakano, *J. Chem. Phys.*, 1993, **99**, 7983–7992.

18. S. Kossmann, F. Neese, *Chem. Phys. Lett.*, 2009, **481**, 240–243.
19. B. A. Hess, *Phys. Rev. A*, 1986, **33**, 3742–3748.
20. G. Jansen, B. A. Hess, *Phys. Rev. A*, 1989, **39**, 6016–6017.
21. N. Douglas, N. M. Kroll, *Ann. Phys.*, 1974, **82**, 89–155.
22. A. Hellweg, C. Hättig, S. Höfener, W. Klopper, *Theor. Chem. Acc.*, 2007, **117**, 587–597.
23. B. A. Heß, C. M. Marian, U. Wahlgren, O. Gropen, *Chem. Phys. Lett.*, 1996, **251**, 365–371.
24. F. Neese, *J. Chem. Phys.*, 2005, **122**, 034107.
25. V. Vallet, L. Maron, C. Teichtel, J. P. Flament, *J. Chem. Phys.*, 2000, **113**, 1391–1402.
26. R. L. Carlin, *Magnetochemistry*, Springer, Berlin, 1986.
